# Supplementary material for: Forecast Model Analysis for the Morbidity of Tuberculosis in Xinjiang, China
Source: PLoS One. 2015 Mar 11;10(3):e0116832. doi: 10.1371/journal.pone.0116832 (PMC4356615; doi:10.1371/journal.pone.0116832)
Supplement: S1 Table — (XLS) [file pone.0116832.s001.xls]

## Sheet: Sheet1
the tuberculosis morbitity	date
16.0717	200401
14.2388	200402
18.0336	200403
15.5503	200404
13.6367	200405
11.7662	200406
10.8847	200407
10.417	200408
9.11087	200409
8.53573	200410
7.31019	200411
6.46092	200412
23.2433	200501
18.3265	200502
20.7392	200503
21.8262	200504
20.3277	200505
16.4268	200506
16.1271	200507
16.1017	200508
13.2064	200509
13.0439	200510
15.4058	200511
11.6166	200512
24.9502	200601
21.6168	200602
22.1144	200603
21.0397	200604
19.0795	200605
18.2238	200606
13.7164	200607
12.4726	200608
11.5771	200609
10.6865	200610
9.40793	200611
7.71142	200612
27.4732	200701
20.4195	200702
20.9756	200703
18.8342	200704
18.2781	200705
16.8781	200706
15.2732	200707
14.2781	200708
13.2634	200709
13.2	200710
12.9854	200711
8.13171	200712
25.4845	200801
21.1933	200802
22.6492	200803
20.864	200804
19.5704	200805
16.5012	200806
16.1814	200807
14.1432	200808
12.5394	200809
12.4057	200810
11.7136	200811
9.68497	200812
22.3672	200901
19.6546	200902
19.7579	200903
19.2416	200904
16.3366	200905
14.2153	200906
13.5395	200907
12.3193	200908
10.2497	200909
11.7843	200910
11.8876	200911
14.9991	200912
18.3913	201001
16.3066	201002
18.294	201003
16.8718	201004
14.1617	201005
12.7117	201006
12.1697	201007
10.6688	201008
8.964	201009
10.9328	201010
10.3723	201011
14.6157	201012
24.3	201101
21.23	201102
26.85	201103
26.06	201104
24.64	201105
18.95	201106
18.17	201107
17.88	201108
13.85	201109
13.54	201110
14.62	201111
16.82	201112
16.99	201201
25.44	201202
27.91	201203
22.44	201204
25.19	201205
19.08	201206
18.69	201207
17.92	201208
20.71	201209
13.74	201210
29.01	201211
27.53	201212
26.4	201301
22.83	201302
26.37	201303
24	201304
25.86	201305
18.72	201306
21.45	201307
18.99	201308
20.59	201309
16	201310
20.16	201311
18.19	201312
22.87	201401
21.26	201402
23.69	201403
24.52	201404
22.69	201405
19.11	201406
